# Supplementary material
Source: PubMed Central journal article supplement (PMC548978)

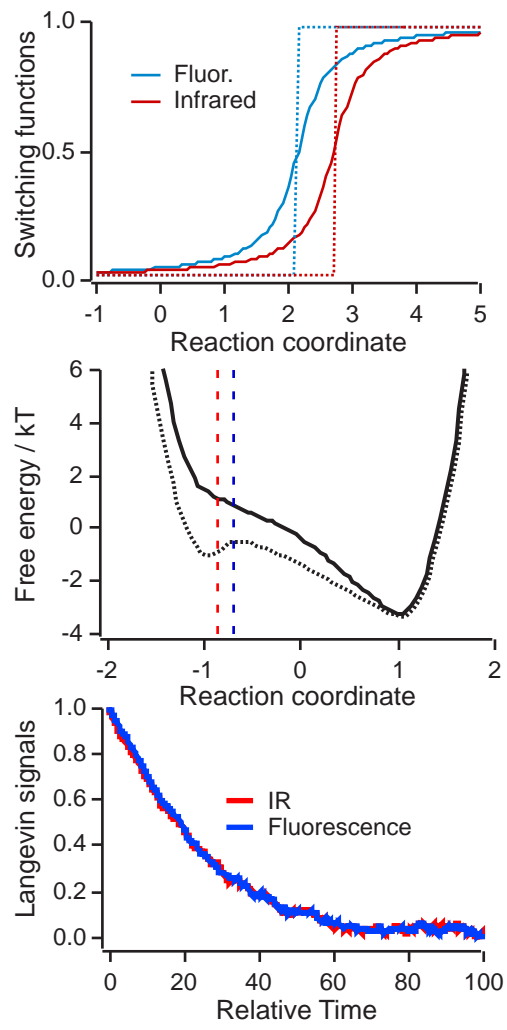

Supplement: pnas_102_7_2283__1.pdf [file pnas_102_7_2283__1.pdf]

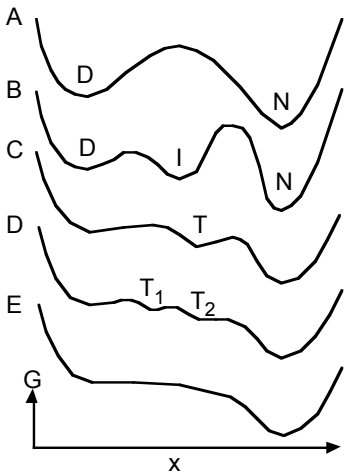

Supplement: pnas_102_7_2283__2.pdf [file pnas_102_7_2283__2.pdf]

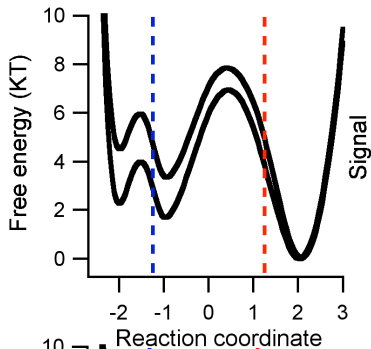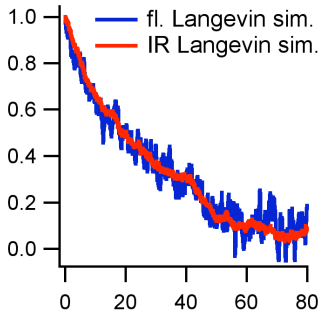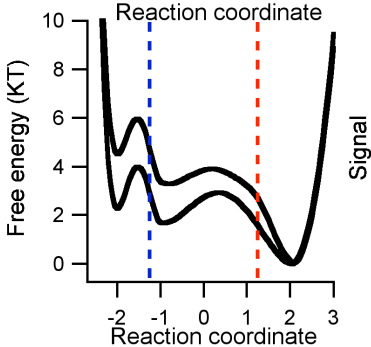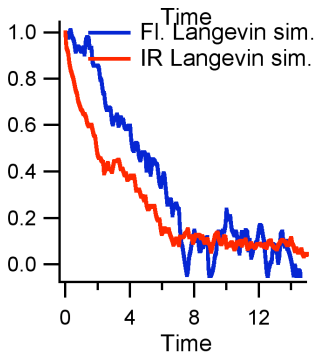

Supplement: pnas_102_7_2283__3.pdf [file pnas_102_7_2283__3.pdf]
